# Supplementary material for: A novel and ultrasensitive yellow to taupe brown colorimetric sensing and removal method for Hg(ii) based on the thermosensitive poly(N-isopropyl acrylamide) stabilized silver nanoparticles
Source: Royal Society of Chemistry journal article supplement (doi:10.1039/c9nj03955d), 2019-01-01
Supplement: c9nj03955d1.pdf [file c9nj03955d1.pdf]

## **New Journal of Chemistry**

### **Supporting information**

A novel and ultrasensitive yellow to taupe brown colorimetric sensing and removal method for Hg(II) based on thermosensitive poly (N-isopropyl acrylamide) stabilized silver nanoparticles

Chenxue Zhu, Jie Bian, Yuxi Li, Junshen Liu, Xunyong Liu,\* Xuezhen Gao, Guiying

Li and Yi Liu\*

School of Chemistry and Materials Science, Ludong University, 264025 Yantai,

Shandong Province, People's Republic of China

Tel./ Fax: +86 535 6672176

E-mail: xunyongliu@126.com; liuyi200541@126.com

### The experimental details of $\text{Hg}^{2+}$ detection

The AgNPs stabilized by PNIPAm were used for colorimetric determination of  $\text{Hg}^{2+}$ . First, the effects of various factors on  $\text{Hg}^{2+}$  colorimetric detection, including the concentration of AgNPs, the pH value and the concentration of  $\text{Hg}^{2+}$  were examined. In order to examine the effect of AgNPs concentration for  $\text{Hg}^{2+}$  detecting,  $1.1 \times 10^{-4}$  M  $\text{Hg}^{2+}$  solutions were added into the mixture of 0.17-1.44 mg/mL PNIPAm and  $5.0 \times 10^{-8}$ - $4.3 \times 10^{-7}$  M AgNPs solutions, respectively. After the colorimetric detection systems were stable, the color change and adsorption spectra of solutions were recorded by a digital camera and a UV-vis spectrophotometer.

To study the  $\text{Hg}^{2+}$  detection by AgNPs/PNIPAm under the circumstance of different pH value, the mixed solutions ( $3.0 \times 10^{-7}$  M AgNPs and  $1.10 \times 10^{-4}$  M  $\text{Hg}^{2+}$  solution) were implemented in a pH range of 3.24–9.94. And the pH value of dye solution was adjusted by  $0.1 \text{ mol} \cdot \text{L}^{-1}$  HCl and  $0.1 \text{ mol} \cdot \text{L}^{-1}$  NaOH solution. Finally, the color change and adsorption spectra of solutions were recorded by a digital camera and a UV-vis spectrophotometer.

For  $\text{Hg}^{2+}$  sensing,  $3.0 \times 10^{-7}$  M AgNPs/PNIPAm solution was mixed with 0 to  $1.10 \times 10^{-4}$  M  $\text{Hg}^{2+}$  solution. After equilibrating at room temperature for 2 min, the color change and the UV-vis absorption spectra of the solution were recorded. All experiments were performed in triplicate.

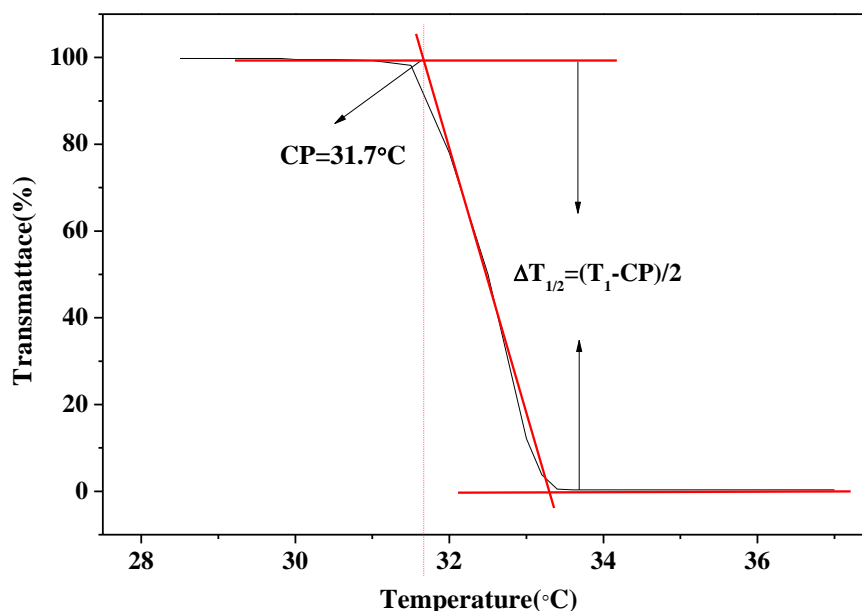

Fig. S1 The typical curve of temperature effect on the light transmittance of the aqueous solution of PNIPAm.

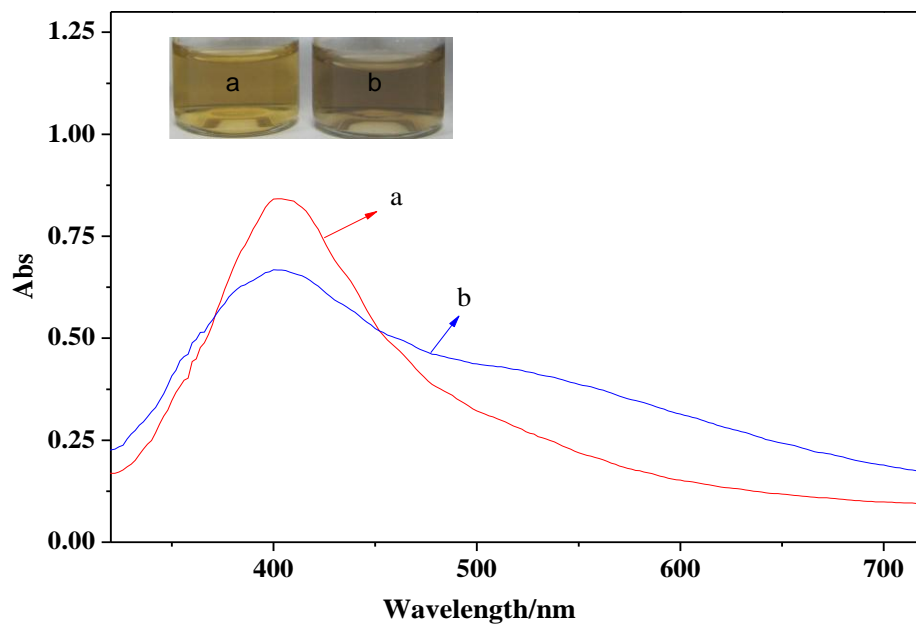

Fig. S2 Adsorption spectra and photographs (inset) of (a) the mixture of  $4.3 \times 10^{-7}$  M AgNPs and 1.44 mg/mL PNIPAM; (b)  $1.10 \times 10^{-4}$  M  $\text{Hg}^{2+}$  was added into the mixture of  $4.3 \times 10^{-7}$  M AgNPs and 1.44 mg/mL PNIPAM with a yellow to taupe brown color change.

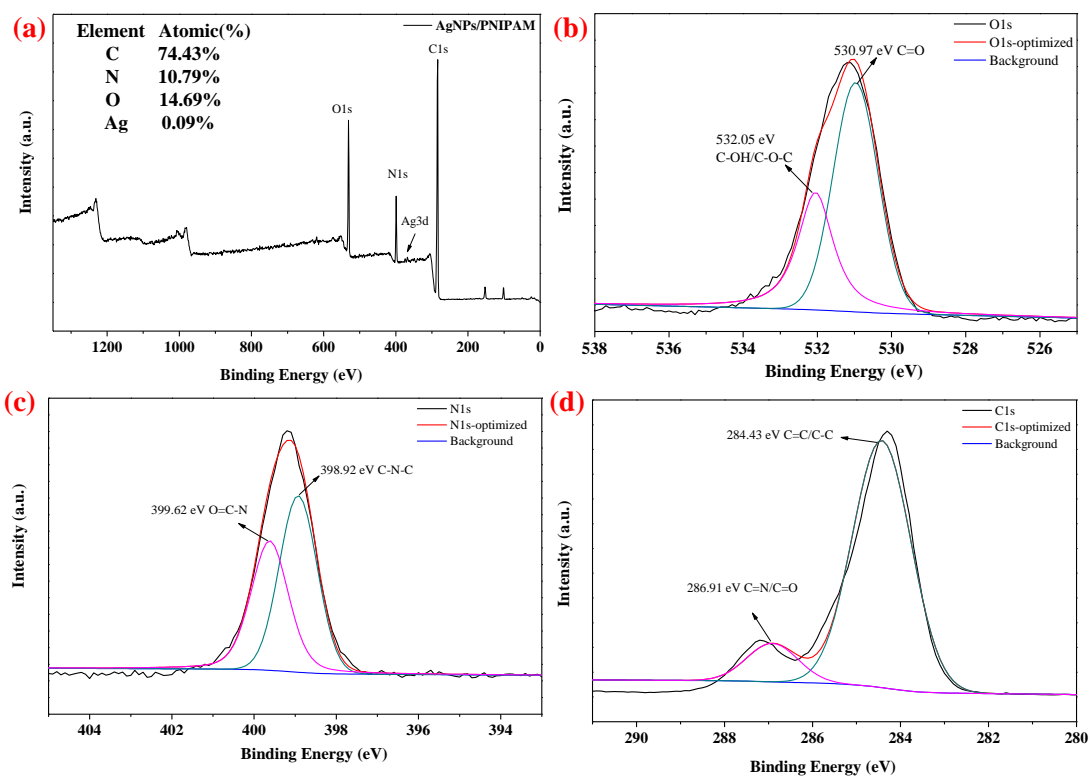

Fig. S3 Full-XPS spectra and C 1s, N 1s and O 1s high-resolution XPS (HRXPS) spectra AgNPs/PNIPAM.

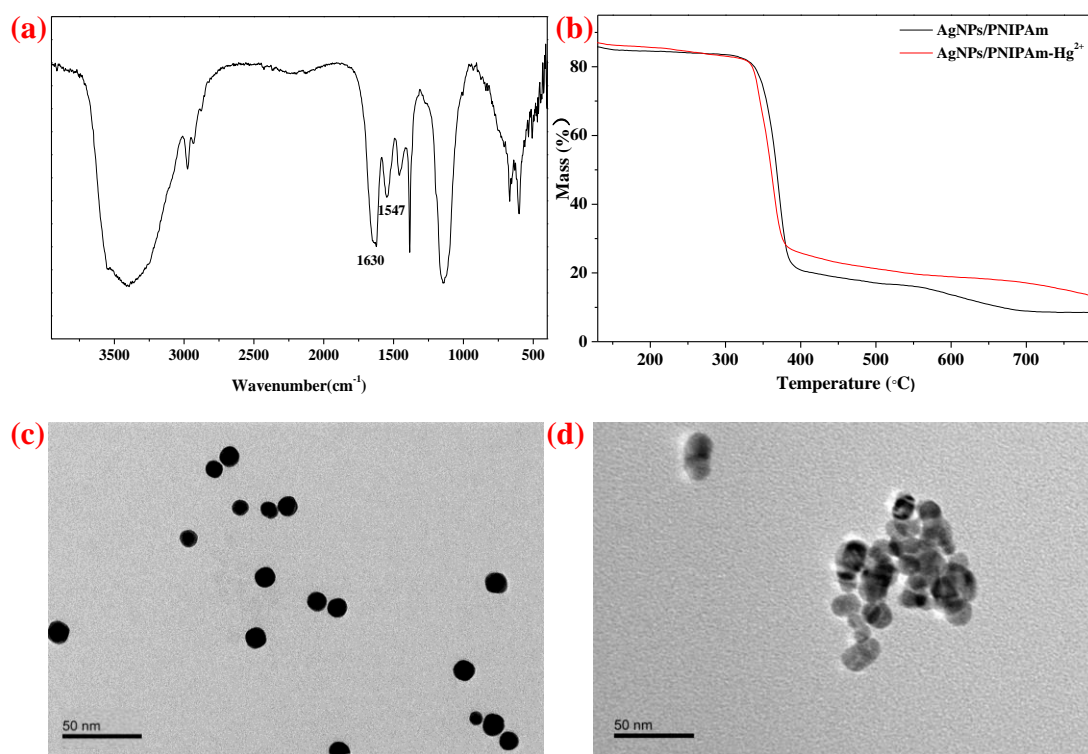

Fig. S4 (a) FTIR spectra of AgNPs/PNIPAm; (b) TGA curves of AgNPs/PNIPAm and AgNPs/PNIPAm-Hg<sup>2+</sup>; TEM images of (c) AgNPs/PNIPAm and (d) pure AgNPs at room temperature after five days.

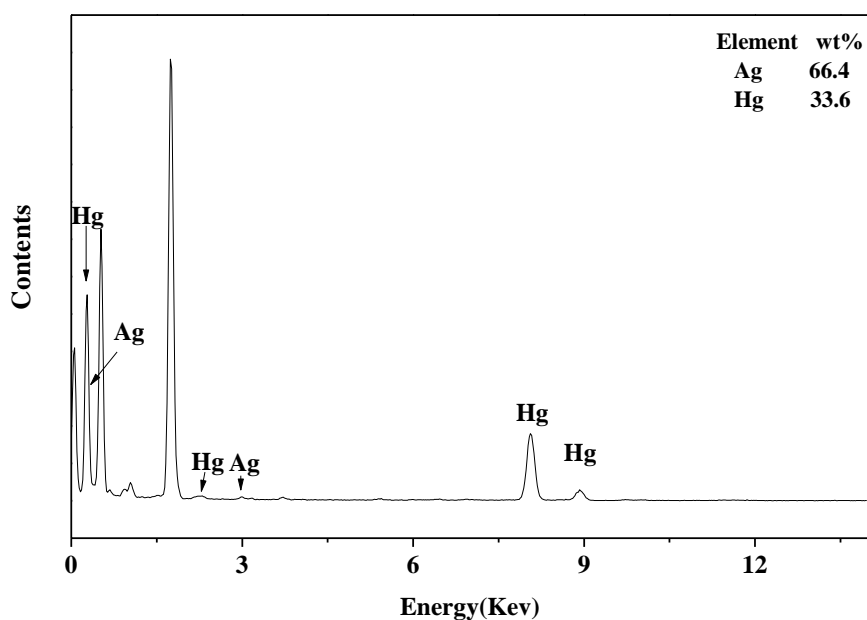

Fig. S5 EDS spectrum of the product of the reaction between the AgNPs and Hg<sup>2+</sup>.

Table S1 Zeta Potential (mV) of pure AgNPs, AgNPs/PNIPAm and sensor in the presence of Hg<sup>2+</sup> by dynamic light scattering

|                     | AgNPs | AgNPs/PNIPAm | AgNPs/PNIPAm-Hg <sup>2+</sup> |
|---------------------|-------|--------------|-------------------------------|
| Size (nm)           | 49.82 | 65.31        | 90.64                         |
| Zeta Potential (mV) | -21.7 | -22.3        | -23.7                         |

**Table S2.** Comparison of LOD for Hg<sup>2+</sup> detection of this work with other reported methods.

| Method      | Materials              | Detection limit | Linear range (μM) | Ref.      |
|-------------|------------------------|-----------------|-------------------|-----------|
| Colorimetry | GO-Ag nanocomposite    | 590 nM          | 5–75              | 1         |
| Colorimetry | lignin –AgNPs          | 23 μM           | 50–450            | 2         |
| Colorimetry | Carrageenan-AgNPs      | 1 μM            | 1–100             | 3         |
| Colorimetry | citrate-AgNPs          | 1.8 μM          | 0.1–5             | 4         |
| Colorimetry | p-PDA capped AgNPs     | 800 nM          | 1–9.1             | 5         |
| Colorimetry | Ag@GO                  | 338 nm          | 50-200            | 6         |
| Colorimetry | SG/AgNPs               | 5 μM            | 5-75              | 7         |
| Colorimetry | AgNPs                  | 2.2 μM          | 10-100            | 8         |
| Colorimetry | AgNPs/PNIPAm composite | 75 nM           | 0.05–27.3         | This work |

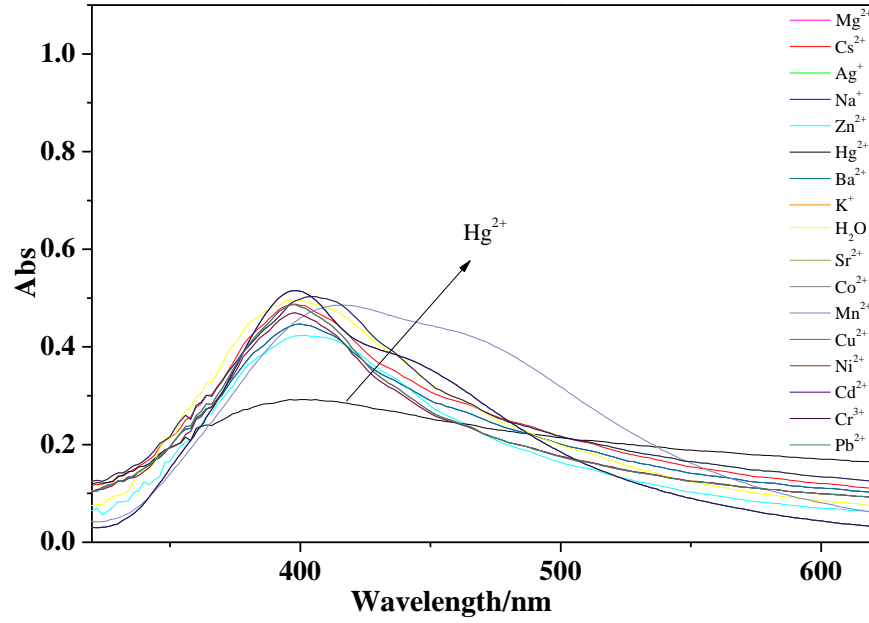

Fig. S6 Adsorption spectra of  $2.0 \times 10^{-7}$  M AgNPs with  $\text{Hg}^{2+}$  and other metal ions ( $1.10 \times 10^{-4}$  M) in the presence of 0.67 mg/mL PNIPAm.

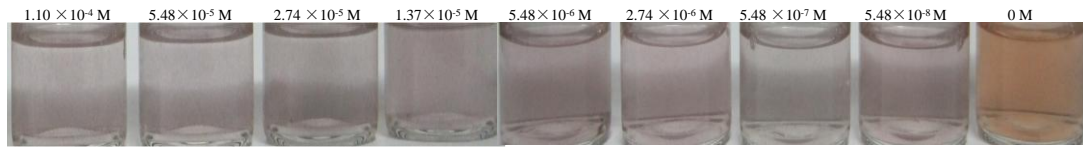

Fig. S7 Photo of  $3.0 \times 10^{-7}$  M AgNPs and 1.0 mg/mL PNIPAm with different concentrations of  $\text{Hg}^{2+}$  range of 0- $1.10 \times 10^{-4}$  M in tap water.

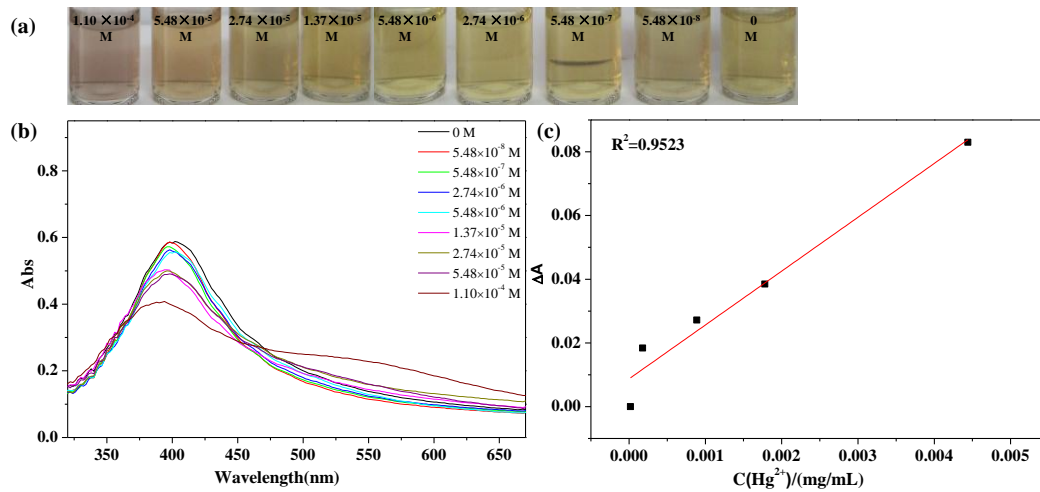

Fig. S8 (a) Photographs and (b) UV-vis adsorption spectra of  $3.0 \times 10^{-7}$  M AgNPs and 1.0 mg/mL PNIPAm with different  $\text{Hg}^{2+}$  concentrations range of 0- $1.10 \times 10^{-4}$  M in drinking water. (c) The values of  $\Delta A$  at 400 nm against the  $\text{Hg}^{2+}$  concentration range in  $5.48 \times 10^{-8}$ - $1.10 \times 10^{-4}$  M.

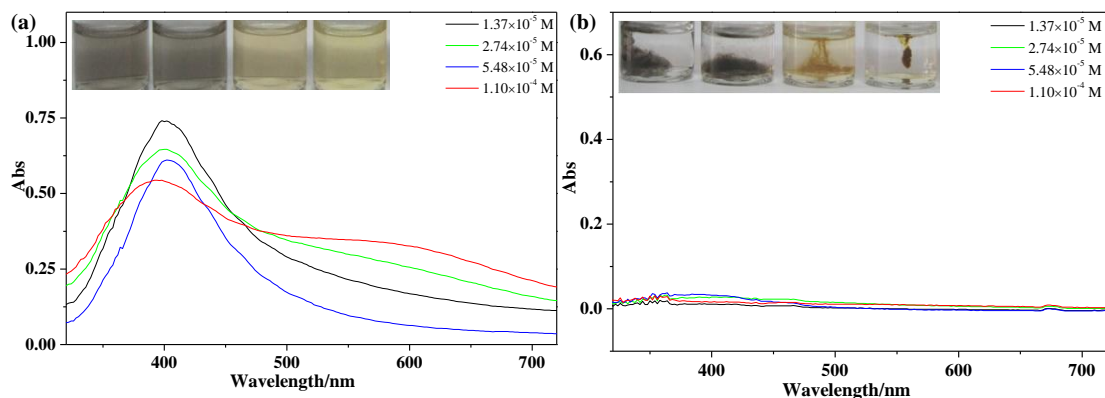

Fig. S9 Colorimetric detection and adsorption of different concentrations  $\text{Hg}^{2+}$  in ultrapure water: UV-vis adsorption spectra and photographs (inset) of  $3.0 \times 10^{-7}$  M AgNPs at (a) room temperature and (b)  $45^\circ\text{C}$ .

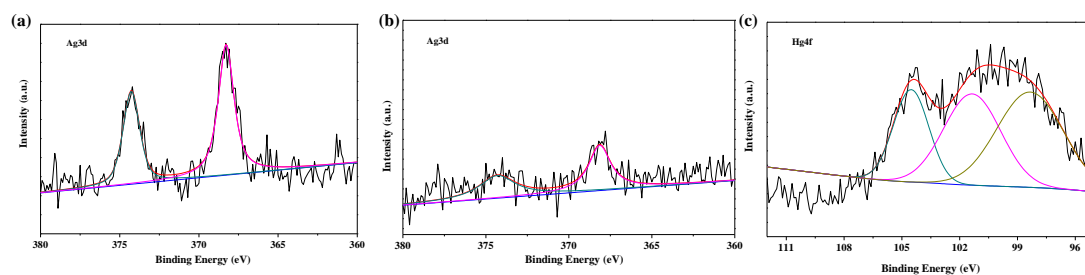

Fig. S10 (a) High-resolution Ag 3d XPS spectra of AgNPs/PNIPAm in the absence of  $\text{Hg}^{2+}$  and high-resolution (b) Ag 3d and (c) Hg 4f XPS spectra of AgNPs/PNIPAm in the presence of  $\text{Hg}^{2+}$ .

## Notes and references

1. A. A. M. Noor, P. Rameshkumar, N. M. Huang and L. S. Wei, *Microchim. Acta*, 2016, **183**, 597-603.
2. T. Xin, Z. K. Zhou, L. Gang, B. Shen, P. D. Kang, L. Jian, L. Qi and F. X. Pei, *ACS Appl. Mater. Interfaces*, 2014, **6**, 16147-16155.
3. K. B. Narayanan and S. S. Han, *Carbohydr. Polym.*, 2017, **160**, 90-96.
4. S. K. Kailasa, M. Chandel, V. N. Mehta and T. J. Park, *Spectrochim. Acta, Part A*, 2018, **195**, 120-127.
5. S. Bothra, J. N. Solanki and S. K. Sahoo, *Sensors & Actuators B Chemical*, 2013, **188**, 937-943.
6. K. Z. Kamali, A. Pandikumar, S. Jayabal, R. Ramaraj, N. L. Hong, B. H. Ong, C. S. D. Bien, Y. Y. Kee and N. M. Huang, *Microchim. Acta*, 2016, **183**, 369-377.
7. P. Rameshkumar, P. Viswanathan and R. Ramaraj, *Sensors & Actuators B Chemical*, 2014, **202**, 1070-1077.
8. K. Farhadi, M. Forough, R. Molaei, S. Hajizadeh and A. Rafipour, *Sensors & Actuators B Chemical*, 2012, **161**, 880-885.
